# Supplementary material
Source: publisher figshare collection journal article supplement (https://springernature.figshare.com/ndownloader/files/13368932)
Supplement: Supplementary file [file 13368932]

## Modified ICC calculation from generalized linear mixed-effects models (GLMMs) with Poisson error structure and log-link.

GLMM structure

$$\begin{aligned} Y_{ij} &\sim \text{Poisson}(\mu_{ij}) \\ \mu_{ij} &= \exp(\beta_0 + \alpha_i + e_{ij}) \\ \alpha_i &\sim \text{Gaussian}(0, \sigma_\alpha^2) \\ e_{ij} &\sim \text{Gaussian}(0, \sigma_e^2) \end{aligned}$$

where  $Y_{ij}$  is the observed count for the  $i$ th individual at the  $j$ th occasion,  $\mu_{ij}$  is the underlying (latent) mean for the  $i$ th individual at the  $j$ th occasion,  $\beta_0$  is the intercept on the link scale,  $\alpha_i$  is the individual (random) effect term with a between-individual variance  $\sigma_\alpha^2$  and  $e_{ij}$  is the additive over-dispersion (residual) term on the log-normal scale with a variance of  $\sigma_e^2$ .

Residual variance

$$\sigma_\varepsilon^2 = \omega + \ln(1/\exp(\beta_0) + 1)$$

where corresponding symbols are same as above with  $\omega$  being the dispersion parameter for the model.

Modified ICC on latent scale

$$ICC_{\text{lnormA}} = \frac{\sigma_\alpha^2}{\sigma_\alpha^2 + \sigma_e^2 + \ln(1/\exp(\beta_0) + 1)}$$

where  $ICC_{\text{lnormA}}$  is the log-normal scale ICC for count data with additive over-dispersion.

Modified ICC on original scale

$$ICC_{\text{countA}} = \frac{E[Y_{ij}]_A \cdot (\exp(\sigma_\alpha^2) - 1)}{E[Y_{ij}]_A \cdot (\exp(\sigma_\alpha^2 + \sigma_e^2) - 1) + 1}$$

where  $ICC_{\text{countA}}$  is the count-scale ICC estimated from a Poisson model with additive over-dispersion,  $E[Y_{ij}]_A$  is the expectation for  $Y_{ij}$ .

$$E[Y_{ij}]_A = \exp(\beta_0 + \frac{\sigma_\alpha^2 + \sigma_e^2}{2})$$

Adapted from work by Nakagawa et al [1]

### Reference

1. Nakagawa S, Schielzeth H. Repeatability for Gaussian and non-Gaussian data: a practical guide for biologists. *Biological Reviews*. 2010;85(4):935-956.
